# Supplementary material for: Influence of Three Probiotics Strains, Lactobacillus rhamnosus GG, Bifidobacterium animalis subsp. Lactis BB-12 and Saccharomyces boulardii CNCM I-745 on the Biochemical and Haematological Profiles and Body Weight of Healthy Rabbits
Source: MDPI journal article supplement (doi:10.3390/biology10111194), 2021-11-17
Supplement: s1 [file s1]

## Supplementary data

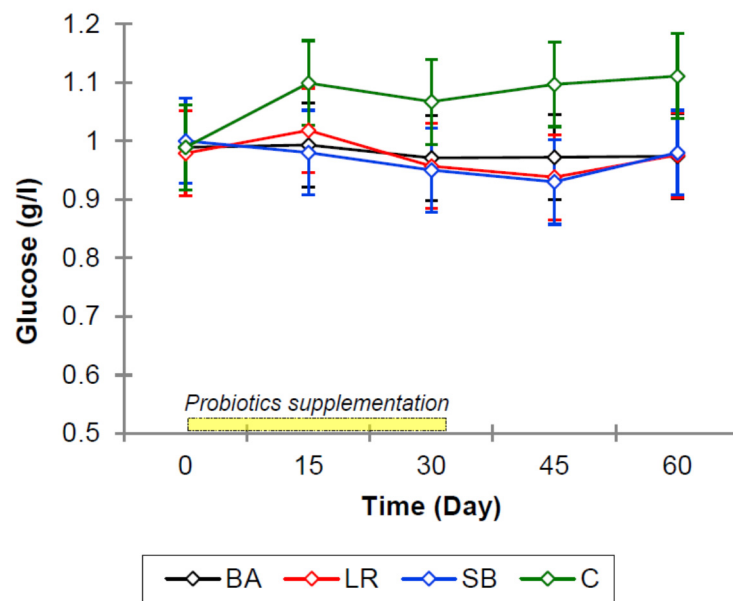

**Figure S1.** Effects of dietary supplementation with probiotics on blood fasting glucose level of healthy rabbits. (C): control group, (BA): *Bifidobacterium animalis* subsp. *Lactis* BB-12 group, (LR): *Lactobacillus rhamnosus* GG group, (SB): *Saccharomyces boulardii* CNCM I-745 group.

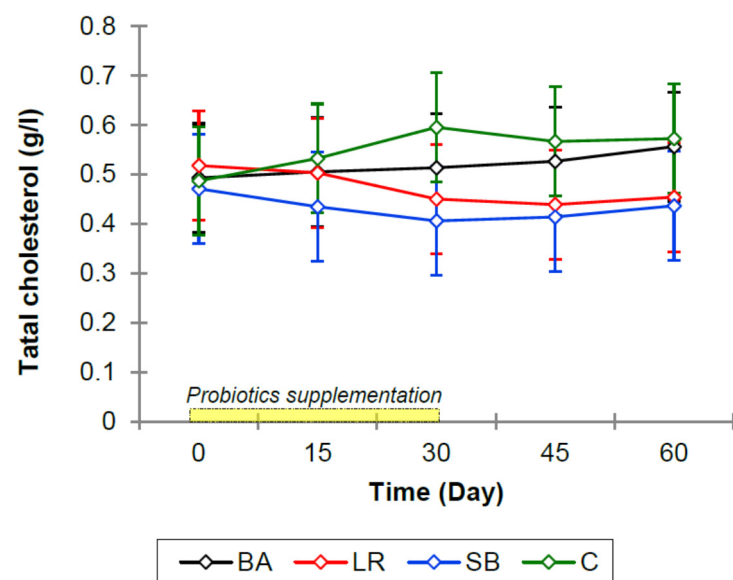

**Figure S2.** Effects of dietary supplementation with probiotics on blood total cholesterol level of healthy rabbits. (C): control group, (BA): *Bifidobacterium animalis* subsp. *Lactis* BB-12 group, (LR): *Lactobacillus rhamnosus* GG group, (SB): *Saccharomyces boulardii* CNCM I-745 group.

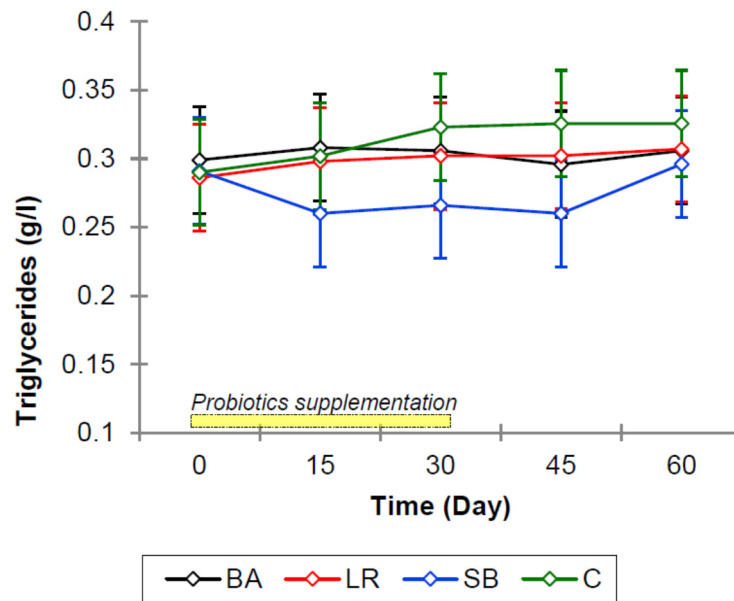

**Figure S3.** Effects of dietary supplementation with probiotics on blood triglycerides level of healthy rabbits. (C): control group, (BA): *Bifidobacterium animalis* subsp. *Lactis* BB-12 group, (LR): *Lactobacillus rhamnosus* GG group, (SB): *Saccharomyces boulardii* CNCM I-745 group.

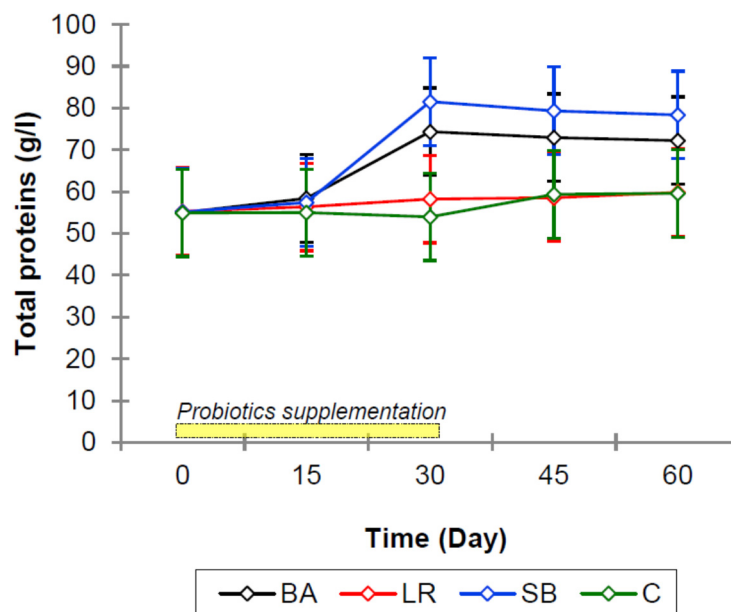

**Figure S4.** Effects of dietary supplementation with probiotics on blood total proteins level of healthy rabbits. (C): control group, (BA): *Bifidobacterium animalis* subsp. *Lactis* BB-12 group, (LR): *Lactobacillus rhamnosus* GG group, (SB): *Saccharomyces boulardii* CNCM I-745 group.

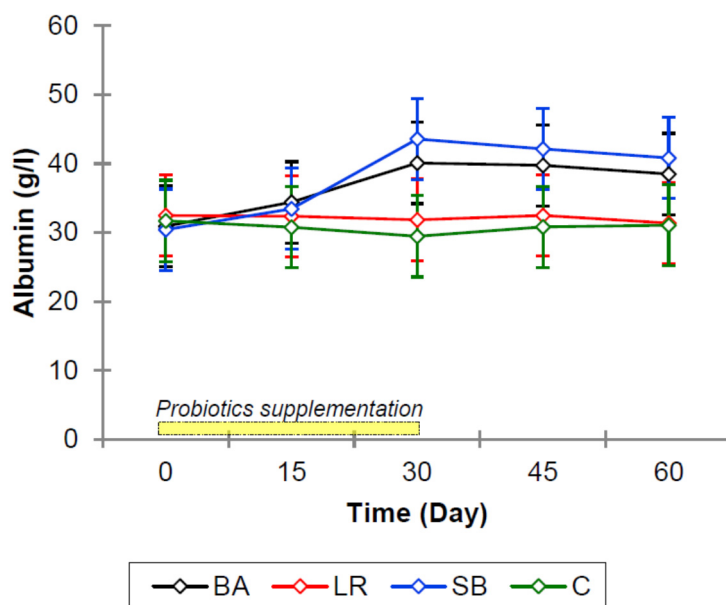

**Figure S5.** Effects of dietary supplementation with probiotics on blood albumin level of healthy rabbits. (C): control group, (BA): *Bifidobacterium animalis* subsp. *Lactis* BB-12 group, (LR): *Lactobacillus rhamnosus* GG group, (SB): *Saccharomyces boulardii* CNCM I-745 group.

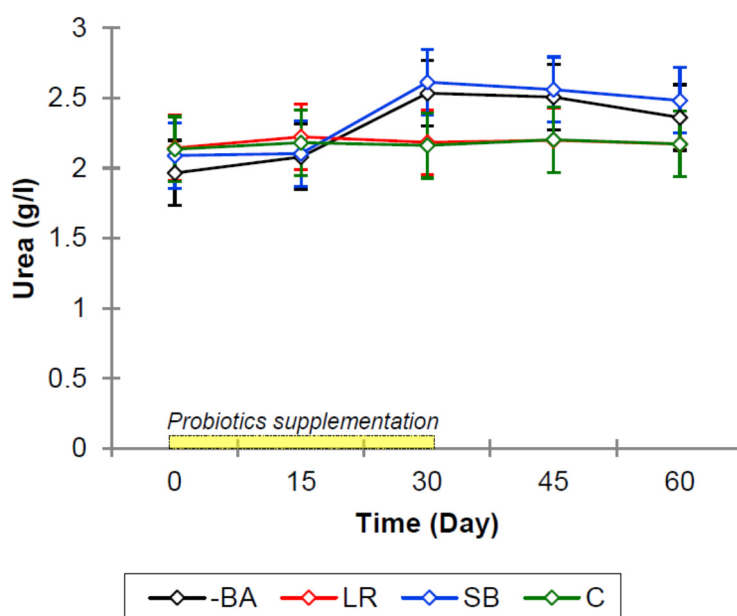

**Figure S6.** Effects of dietary supplementation with probiotics on blood urea level of healthy rabbits. (C): control group, (BA): *Bifidobacterium animalis* subsp. *Lactis* BB-12 group, (LR): *Lactobacillus rhamnosus* GG group, (SB): *Saccharomyces boulardii* CNCM I-745 group.

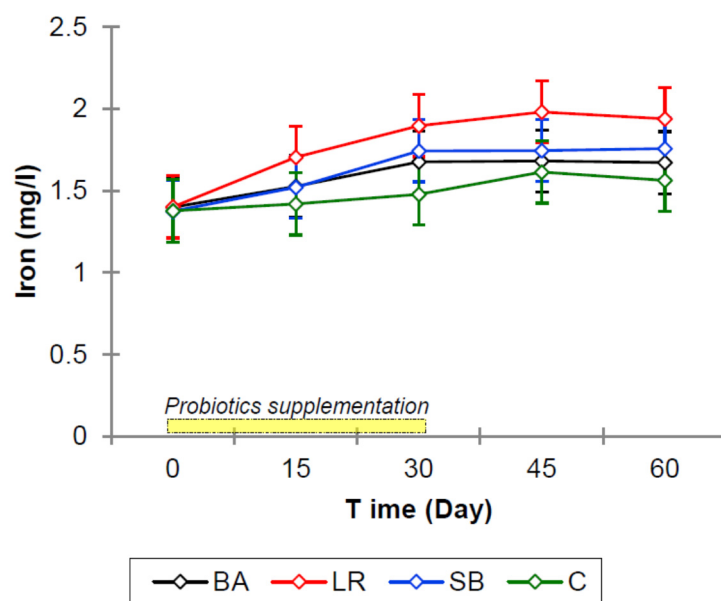

**Figure S7.** Effects of dietary supplementation with probiotics on blood iron level of healthy rabbits. (C): control group, (BA): *Bifidobacterium animalis* subsp. *Lactis* BB-12 group, (LR): *Lactobacillus rhamnosus* GG group, (SB): *Saccharomyces boulardii* CNCM I-745 group.

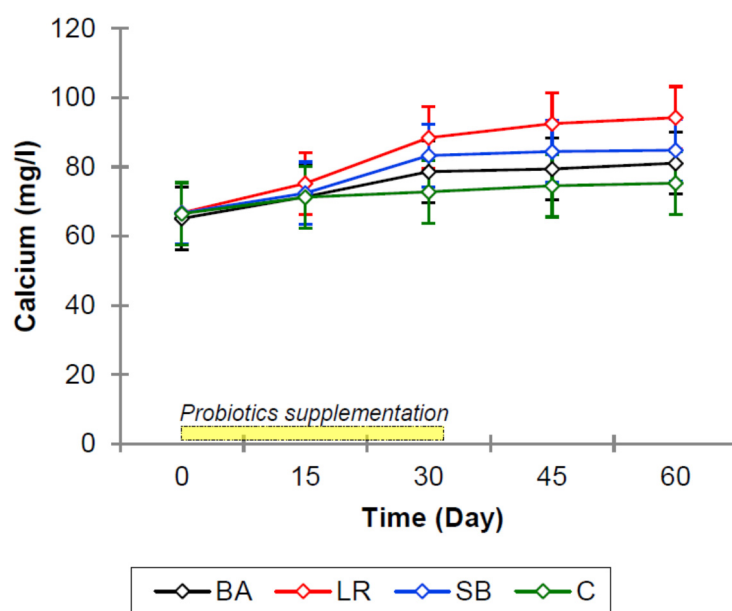

**Figure S8.** Effects of dietary supplementation with probiotics on blood calcium level of healthy rabbits. (C): control group, (BA): *Bifidobacterium animalis* subsp. *Lactis* BB-12 group, (LR): *Lactobacillus rhamnosus* GG group, (SB): *Saccharomyces boulardii* CNCM I-745 group.

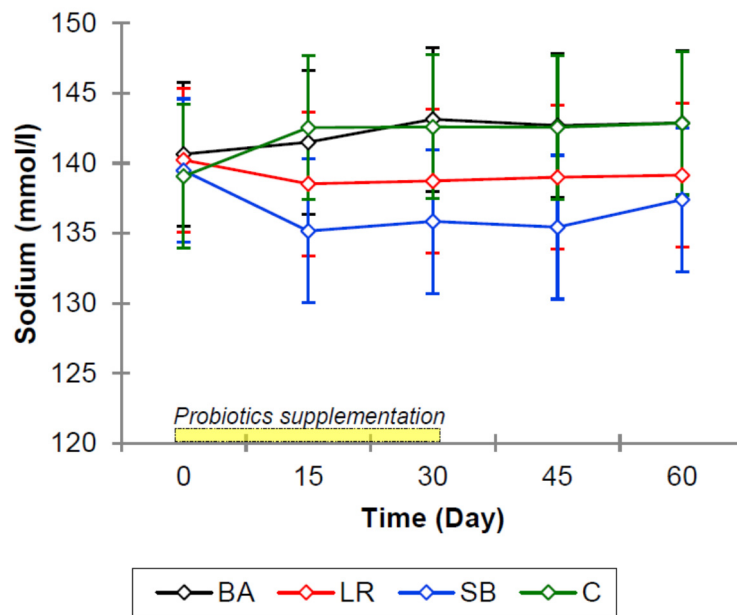

**Figure S9.** Effects of dietary supplementation with probiotics on blood sodium level of healthy rabbits. (C): control group, (BA): *Bifidobacterium animalis* subsp. *Lactis* BB-12 group, (LR): *Lactobacillus rhamnosus* GG group, (SB): *Saccharomyces boulardii* CNCM I-745 group.

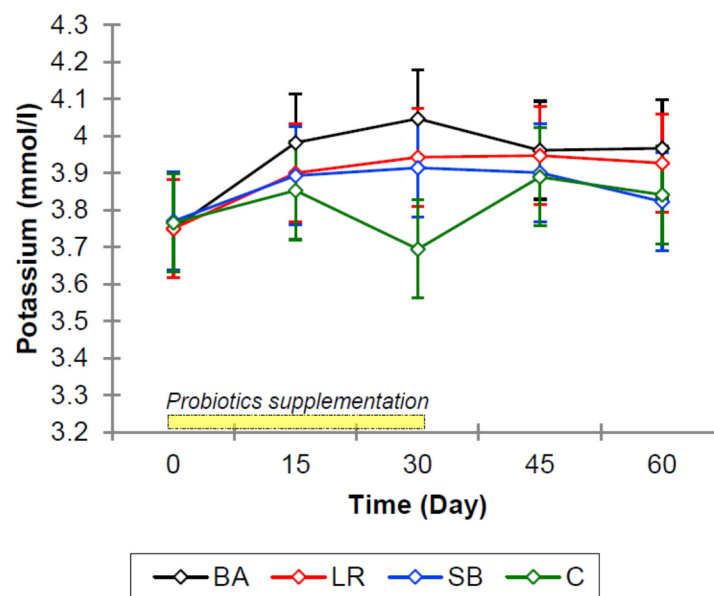

**Figure S10.** Effects of dietary supplementation with probiotics on blood potassium level of healthy rabbits. (C): control group, (BA): *Bifidobacterium animalis* subsp. *Lactis* BB-12 group, (LR): *Lactobacillus rhamnosus* GG group, (SB): *Saccharomyces boulardii* CNCM I-745 group.

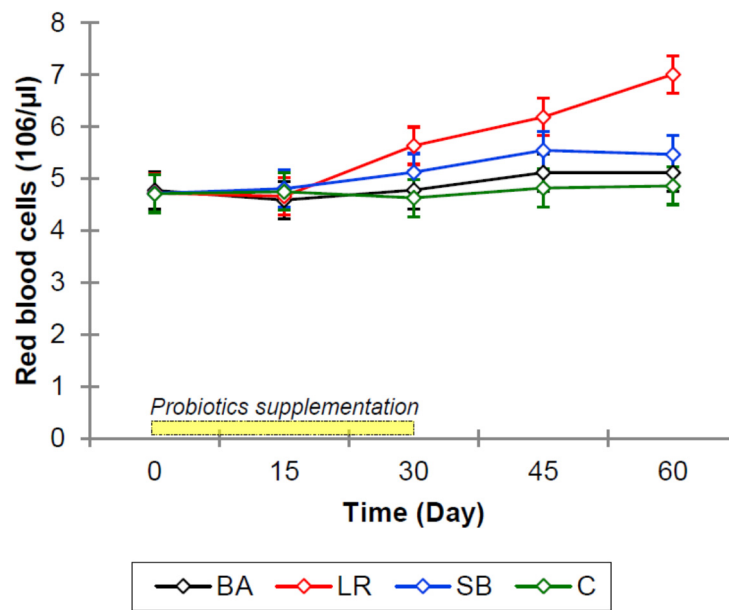

**Figure S11.** Effects of dietary supplementation with probiotics on number of red blood cells of healthy rabbits. (C): control group, (BA): *Bifidobacterium animalis* subsp. *Lactis* BB-12 group, (LR): *Lactobacillus rhamnosus* GG group, (SB): *Saccharomyces boulardii* CNCM I-745 group.

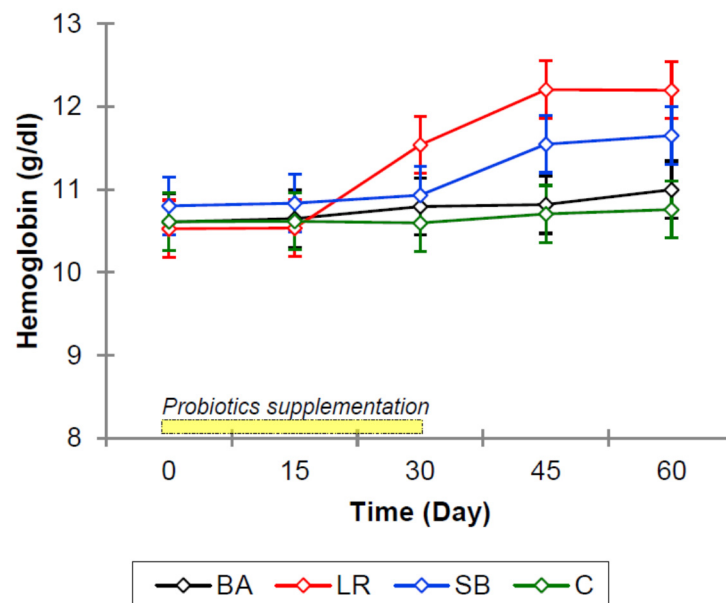

**Figure S12.** Effects of dietary supplementation with probiotics on number of blood hemoglobin level of healthy rabbits. (C): control group, (BA): *Bifidobacterium animalis* subsp. *Lactis* BB-12 group, (LR): *Lactobacillus rhamnosus* GG group, (SB): *Saccharomyces boulardii* CNCM I-745 group.

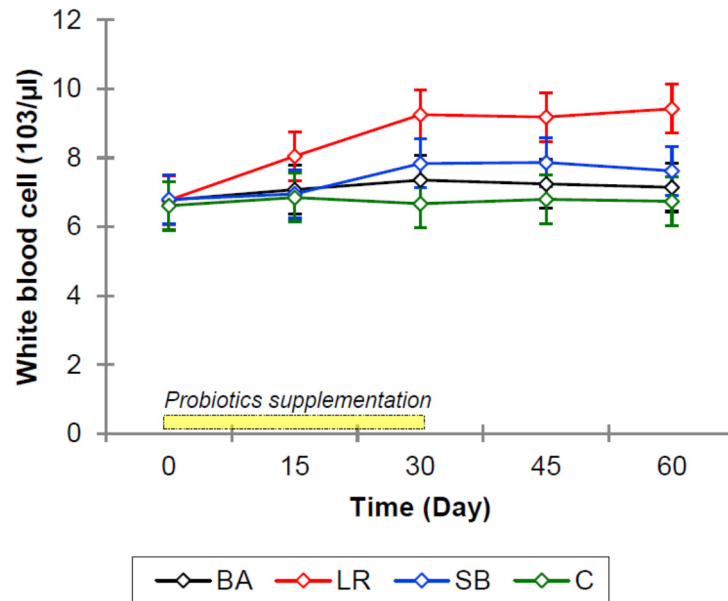

**Figure S13.** Effects of dietary supplementation with probiotics on number of white blood cells of healthy rabbits. (C): control group, (BA): *Bifidobacterium animalis* subsp. *Lactis* BB-12 group, (LR): *Lactobacillus rhamnosus* GG group, (SB): *Saccharomyces boulardii* CNCM I-745 group.

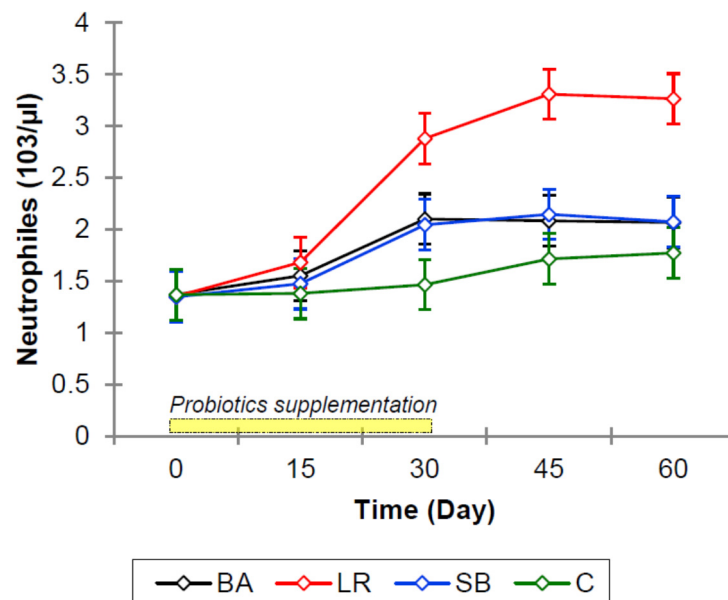

**Figure S14.** Effects of dietary supplementation with probiotics on number of neutrophils of healthy rabbits. (C): control group, (BA): *Bifidobacterium animalis* subsp. *Lactis* BB-12 group, (LR): *Lactobacillus rhamnosus* GG group, (SB): *Saccharomyces boulardii* CNCM I-745 group.
