# Supplementary material for: Influence of Three Probiotics Strains, Lactobacillus rhamnosus GG, Bifidobacterium animalis subsp. Lactis BB-12 and Saccharomyces boulardii CNCM I-745 on the Biochemical and Haematological Profiles and Body Weight of Healthy Rabbits
Source: Biology (Basel). 2021 Nov 17;10(11):1194. doi: 10.3390/biology10111194 (PMC8615081; doi:10.3390/biology10111194)
Supplement: Supplementary file 1 [file biology-10-01194-s001.zip]

Archive with 5 entries (5 files):
- biology-1431328-supplementary_Figures.pdf
- biology-1431328-supplementary_Table S1.xlsx
- biology-1431328-supplementary_Table S2.xlsx
- biology-1431328-supplementary_Table S3.xlsx
- biology-1431328-supplementary_Table S4.xlsx
