# Supplementary material for: Influence of Three Probiotics Strains, Lactobacillus rhamnosus GG, Bifidobacterium animalis subsp. Lactis BB-12 and Saccharomyces boulardii CNCM I-745 on the Biochemical and Haematological Profiles and Body Weight of Healthy Rabbits
Source: Biology (Basel). 2021 Nov 17;10(11):1194. doi: 10.3390/biology10111194 (PMC8615081; doi:10.3390/biology10111194)
Supplement: Supplementary file 1 [file biology-10-01194-s001.zip › biology-1431328-supplementary_Table S1.xlsx]

## Sheet: Table S1A. GLU (g L)
Table S1A. Effects of dietary supplementation with probiotics on Blood glucose concentration of healthy rabbits.
Summary of the effects	Group (G)	***	Sex (S)	ns	Day (D)	ns	G x S	ns	G x D	ns	SxD	ns	GxSxD	ns
Significance:***:P<0.001; ns: not significant
Details of all the effects
Group effect
Contrast	Difference	Standardized difference	Critical value	Pr > Diff	Significant
C vs SB	0.104412	4.50017	2.59624	< 0,0001	Yes
C vs LR	0.0988115	4.25881	2.59624	0.000203274	Yes
C vs BA	0.0927058	3.99565	2.59624	0.000564488	Yes
BA vs SB	0.0117058	0.504522	2.59624	0.957907	No
BA vs LR	0.00610576	0.26316	2.59624	0.993595	No
LR vs SB	0.0056	0.241362	2.59624	0.995038	No
Tukey's d critical value:			3.67163
Category	LS means	Standard error	Lower bound (95%)	Upper bound (95%)	Groups
C	1.07241	0.0164061	1.04001	1.10481	A
BA	0.979706	0.0164061	0.947305	1.01211		B
LR	0.9736	0.0164061	0.9412	1.006		B
SB	0.968	0.0164061	0.9356	1.0004		B
(C): control group, (BA): Bifidobacterium animalis subsp. Lactis BB-12 group, (LR): Lactobacillus rhamnosus GG group, (SB): Saccharomyces boulardii CNCM I-745 group.
Sex effect
Contrast	Difference	Standardized difference	Critical value	Pr > Diff	Significant
Female vs Male	0.0125843	0.767052	1.9749	0.444181	No
Tukey's d critical value:			2.79293
Category	LS means	Standard error	Lower bound (95%)	Upper bound (95%)	Groups
Female	1.00472	0.0116008	0.981811	1.02763	A
Male	0.992137	0.0116008	0.969227	1.01505	A
Day effect
Contrast	Difference	Standardized difference	Critical value	Pr > Diff	Significant
15 vs 45	0.0383285	1.47757	2.75913	0.57853	No
15 vs 30	0.0362893	1.39896	2.75913	0.629236	No
15 vs 0	0.0332107	1.28028	2.75913	0.7037	No
15 vs 60	0.0123285	0.475267	2.75913	0.989484	No
60 vs 45	0.026	1.0023	2.75913	0.853993	No
60 vs 30	0.0239607	0.923689	2.75913	0.88739	No
60 vs 0	0.0208822	0.805011	2.75913	0.928762	No
0 vs 45	0.0051178	0.197292	2.75913	0.999659	No
0 vs 30	0.00307853	0.118678	2.75913	0.999955	No
30 vs 45	0.00203927	0.078614	2.75913	0.999991	No
Tukey's d critical value:			3.90201
Category	LS means	Standard error	Lower bound (95%)	Upper bound (95%)	Groups
0	0.98925	0.0183425	0.953025	1.02547	A
15	1.02246	0.0183425	0.986236	1.05869	A
30	0.986171	0.0183425	0.949947	1.0224	A
45	0.984132	0.0183425	0.947908	1.02036	A
60	1.01013	0.0183425	0.973908	1.04636	A

## Sheet: Table S1B. TC (g L)
Table S1B. Effects of dietary supplementation with probiotics on blood total cholestrol concentration of healthy rabbits.
Summary of the effects	Group (G)	**	Sex (S)	ns	Day (D)	ns	G x S	**	G x D	ns	SxD	ns	GxSxD	ns
Significance:**: P<0.01; ns: not significant
Details of all the effects
Group effect
Contrast	Difference	Standardized difference	Critical value	Pr > Diff	Significant
C vs SB	0.118252	3.35478	2.59624	0.00542854	Yes
C vs LR	0.0780524	2.21432	2.59624	0.123745	No
C vs BA	0.0320262	0.908572	2.59624	0.800303	No
BA vs SB	0.0862262	2.44621	2.59624	0.0726698	No
BA vs LR	0.0460262	1.30575	2.59624	0.560629	No
LR vs SB	0.0402	1.14046	2.59624	0.665081	No
Tukey's d critical value:			3.67163
Category	LS means	Standard error	Lower bound (95%)	Upper bound (95%)	Groups
C	0.550852	0.0249248	0.501628	0.600076	A
BA	0.518826	0.0249248	0.469602	0.56805	A	B
LR	0.4728	0.0249248	0.423576	0.522024	A	B
SB	0.4326	0.0249248	0.383376	0.481824		B
(C): control group, (BA): Bifidobacterium animalis subsp. Lactis BB-12 group, (LR): Lactobacillus rhamnosus GG group, (SB): Saccharomyces boulardii CNCM I-745 group.
Sex effect
Contrast	Difference	Standardized difference	Critical value	Pr > Diff	Significant
Female vs Male	0.0154377	0.619372	1.9749	0.536552	No
Tukey's d critical value:			2.79293
Category	LS means	Standard error	Lower bound (95%)	Upper bound (95%)	Groups
Female	0.501488	0.0176245	0.466682	0.536295	A
Male	0.486051	0.0176245	0.451244	0.520857	A
Day effect
Contrast	Difference	Standardized difference	Critical value	Pr > Diff	Significant
60 vs 45	0.0185	0.46943	2.75913	0.989965	No
60 vs 30	0.0138442	0.351292	2.75913	0.996706	No
60 vs 0	0.0127827	0.324356	2.75913	0.997585	No
60 vs 15	0.0111885	0.283903	2.75913	0.998566	No
15 vs 45	0.00731152	0.185527	2.75913	0.999733	No
15 vs 30	0.00265576	0.0673888	2.75913	0.999995	No
15 vs 0	0.00159424	0.0404532	2.75913	0.999999	No
0 vs 45	0.00571728	0.145074	2.75913	0.999899	No
0 vs 30	0.00106152	0.0269356	2.75913	1	No
30 vs 45	0.00465576	0.118138	2.75913	0.999956	No
Tukey's d critical value:			3.90201
Category	LS means	Standard error	Lower bound (95%)	Upper bound (95%)	Groups
60	0.505033	0.0278667	0.449999	0.560067	A
15	0.493844	0.0278667	0.43881	0.548878	A
0	0.49225	0.0278667	0.437216	0.547284	A
30	0.491188	0.0278667	0.436154	0.546223	A
45	0.486533	0.0278667	0.431499	0.541567	A

## Sheet: Table S1C. HDL (g L)
Table S1C. Effects of dietary supplementation with probiotics on Blood HDL concentration of healthy rabbits.
Summary of the effects	Group (G)	ns	Sex (S)	ns	Day (D)	ns	G x S	ns	G x D	ns	SxD	ns	GxSxD	ns
ns: not significant
Details of all the effects
Group effect
Contrast	Difference	Standardized difference	Critical value	Pr > Diff	Significant
BA vs C	0.0239644	1.53129	2.59624	0.421275	No
BA vs SB	0.0152356	0.973534	2.59624	0.764701	No
BA vs LR	0.0028356	0.181191	2.59624	0.99788	No
LR vs C	0.0211288	1.3501	2.59624	0.532538	No
LR vs SB	0.0124	0.792343	2.59624	0.857844	No
SB vs C	0.0087288	0.557758	2.59624	0.944312	No
Tukey's d critical value:			3.67163
Category	LS means	Standard error	Lower bound (95%)	Upper bound (95%)	Groups
BA	0.154436	0.0110661	0.132581	0.17629	A
LR	0.1516	0.0110661	0.129746	0.173454	A
SB	0.1392	0.0110661	0.117346	0.161054	A
C	0.130471	0.0110661	0.108617	0.152326	A
(C): control group, (BA): Bifidobacterium animalis subsp. Lactis BB-12 group, (LR): Lactobacillus rhamnosus GG group, (SB): Saccharomyces boulardii CNCM I-745 group.
Sex effect
Contrast	Difference	Standardized difference	Critical value	Pr > Diff	Significant
Female vs Male	0.00393927	0.355977	1.9749	0.722327	No
Tukey's d critical value:			2.79293
Category	LS means	Standard error	Lower bound (95%)	Upper bound (95%)	Groups
Female	0.145896	0.00782489	0.130443	0.16135	A
Male	0.141957	0.00782489	0.126504	0.15741	A
Day effect
Contrast	Difference	Standardized difference	Critical value	Pr > Diff	Significant
30 vs 0	0.0171963	0.982816	2.75913	0.862701	No
30 vs 60	0.0129018	0.737374	2.75913	0.947413	No
30 vs 15	0.0123482	0.705731	2.75913	0.954942	No
30 vs 45	0.00640183	0.365882	2.75913	0.996143	No
45 vs 0	0.0107945	0.616935	2.75913	0.972222	No
45 vs 60	0.0065	0.371492	2.75913	0.995909	No
45 vs 15	0.00594634	0.339849	2.75913	0.997104	No
15 vs 0	0.00484817	0.277086	2.75913	0.998696	No
15 vs 60	0.000553665	0.0316434	2.75913	1	No
60 vs 0	0.0042945	0.245442	2.75913	0.999191	No
Tukey's d critical value:			3.90201
Category	LS means	Standard error	Lower bound (95%)	Upper bound (95%)	Groups
30	0.153696	0.0123722	0.129262	0.17813	A
45	0.147295	0.0123722	0.122861	0.171728	A
15	0.141348	0.0123722	0.116914	0.165782	A
60	0.140795	0.0123722	0.116361	0.165228	A
0	0.1365	0.0123722	0.112066	0.160934	A

## Sheet: Table S1D. TG (g L)
Table S1D. Effects of dietary supplementation with probiotics on Blood triglycerides concentration of healthy rabbits.
Summary of the effects	Group (G)	*	Sex (S)	**	Day (D)	ns	G x S	***	G x D	ns	SxD	ns	GxSxD	ns
Significance::* P<0.05;**: P<0.01;***:P<0.001; ns: not significant
Details of all the effects
Group effect
Contrast	Difference	Standardized difference	Critical value	Pr > Diff	Significant
C vs SB	0.0385396	3.09653	2.59624	0.012266	Yes
C vs LR	0.0141396	1.13607	2.59624	0.667809	No
C vs BA	0.0102958	0.827236	2.59624	0.841484	No
BA vs SB	0.0282437	2.26929	2.59624	0.109633	No
BA vs LR	0.00384375	0.308833	2.59624	0.98975	No
LR vs SB	0.0244	1.96046	2.59624	0.207453	No
Tukey's d critical value:			3.67163
Category	LS means	Standard error	Lower bound (95%)	Upper bound (95%)	Groups
C	0.31314	0.00880069	0.295759	0.33052	A
BA	0.302844	0.00880069	0.285463	0.320224	A	B
LR	0.299	0.00880069	0.281619	0.316381	A	B
SB	0.2746	0.00880069	0.257219	0.291981		B
(C): control group, (BA): Bifidobacterium animalis subsp. Lactis BB-12 group, (LR): Lactobacillus rhamnosus GG group, (SB): Saccharomyces boulardii CNCM I-745 group.
Sex effect
Contrast	Difference	Standardized difference	Critical value	Pr > Diff	Significant
Male vs Female	0.0280521	3.18749	1.9749	0.0017263	Yes
Tukey's d critical value:			2.79293
Category	LS means	Standard error	Lower bound (95%)	Upper bound (95%)	Groups
Male	0.311422	0.00622303	0.299132	0.323712	A
Female	0.28337	0.00622303	0.27108	0.29566		B
Day effect
60 vs 0	0.0170547	1.22562	2.75913	0.736469	No
60 vs 15	0.0166198	1.19437	2.75913	0.754623	No
60 vs 45	0.01275	0.91627	2.75913	0.890299	No
60 vs 30	0.00936979	0.673353	2.75913	0.961884	No
30 vs 0	0.0076849	0.55227	2.75913	0.981524	No
30 vs 15	0.00725	0.521016	2.75913	0.985133	No
30 vs 45	0.00338021	0.242916	2.75913	0.999223	No
45 vs 0	0.00430469	0.309353	2.75913	0.997993	No
45 vs 15	0.00386979	0.2781	2.75913	0.998678	No
15 vs 0	0.000434896	0.0312535	2.75913	1	No
Tukey's d critical value:			3.90201
Category	LS means	Standard error	Lower bound (95%)	Upper bound (95%)	Groups
60	0.308555	0.00983947	0.289123	0.327987	A
30	0.299185	0.00983947	0.279753	0.318617	A
45	0.295805	0.00983947	0.276373	0.315237	A
15	0.291935	0.00983947	0.272503	0.311367	A
0	0.2915	0.00983947	0.272068	0.310932	A

## Sheet: Table S1E. TP (g L)
Table S1E. Effects of dietary supplementation with probiotics on Blood total proteins concentration of healthy rabbits.
Summary of the effects	Group (G)	***	Sex (S)	***	Day (D)	***	G x S	ns	G x D	ns	SxD	ns	GxSxD	ns
Significance::***:P<0.001; ns: not significant
Details of all the effects
Group effect
Contrast	Difference	Standardized difference	Critical value	Pr > Diff	Significant
SB vs C	13.795	4.12	2.596	0	Yes
SB vs LR	12.704	3.794	2.596	0.001	Yes
SB vs BA	3.762	1.124	2.596	0.676	No
BA vs C	10.033	2.996	2.596	0.017	Yes
BA vs LR	8.942	2.67	2.596	0.041	Yes
LR vs C	1.091	0.326	2.596	0.988	No
Tukey's d critical value:			3.672
Category	LS means	Standard error	Lower bound (95%)	Upper bound (95%)	Groups
SB	70.345	2.368	65.669	75.021	A
BA	66.583	2.368	61.907	71.259	A
LR	57.641	2.368	52.965	62.317		B
C	56.55	2.368	51.874	61.226		B
(C): control group, (BA): Bifidobacterium animalis subsp. Lactis BB-12 group, (LR): Lactobacillus rhamnosus GG group, (SB): Saccharomyces boulardii CNCM I-745 group.
Sex effect
Contrast	Difference	Standardized difference	Critical value	Pr > Diff	Significant
Male vs Female	16.8101	7.09961	1.9749	< 0,0001	Yes
Tukey's d critical value:			2.79293
Category	LS means	Standard error	Lower bound (95%)	Upper bound (95%)	Groups
Male	71.1849	1.67425	67.8784	74.4914	A
Female	54.3748	1.67425	51.0683	57.6813		B
Day effect
Contrast	Difference	Standardized difference	Critical value	Pr > Diff	Significant
45 vs 0	12.4745	3.33209	2.75913	0.00933394	Yes
45 vs 15	10.7697	2.87673	2.75913	0.0363772	Yes
45 vs 30	0.531746	0.142036	2.75913	0.999908	No
45 vs 60	0.0385	0.0102838	2.75913	1	No
60 vs 0	12.436	3.32181	2.75913	0.00964592	Yes
60 vs 15	10.7312	2.86645	2.75913	0.0374244	Yes
60 vs 30	0.493246	0.131752	2.75913	0.999931	No
30 vs 0	11.9427	3.19005	2.75913	0.0145727	Yes
30 vs 15	10.238	2.73469	2.75913	0.0533213	No
15 vs 0	1.70475	0.455359	2.75913	0.991061	No
Tukey's d critical value:			3.90201
Category	LS means	Standard error	Lower bound (95%)	Upper bound (95%)	Groups
45	67.5427	2.64723	62.3147	72.7707	A
60	67.5042	2.64723	62.2762	72.7322	A
30	67.011	2.64723	61.783	72.239	A	B
15	56.773	2.64723	51.545	62.001		B	C
0	55.0683	2.64723	49.8402	60.2963			C

## Sheet: Table S1F. ALB (g L)
Table S1F. Effects of dietary supplementation with probiotics on Blood total proteins concentration of healthy rabbits.
Summary of the effects	Group (G)	***	Sex (S)	***	Day (D)	ns	G x S	ns	G x D	ns	SxD	ns	GxSxD	ns
Significance::***:P<0.001; ns: not significant
Details of all the effects
Group effect
Contrast	Difference	Standardized difference	Critical value	Pr > Diff	Significant
SB vs C	7.31459	3.8804	2.59624	0.000868673	Yes
SB vs LR	5.9706	3.16741	2.59624	0.00986449	Yes
SB vs BA	1.35251	0.717511	2.59624	0.890018	No
BA vs C	5.96207	3.16289	2.59624	0.0100039	Yes
BA vs LR	4.61809	2.4499	2.59624	0.0720233	No
LR vs C	1.34399	0.712987	2.59624	0.89183	No
Tukey's d critical value:			3.67163
Category	LS means	Standard error	Lower bound (95%)	Upper bound (95%)	Groups
SB	38.0662	1.3329	35.4338	40.6986	A
BA	36.7137	1.3329	34.0813	39.346	A	B
LR	32.0956	1.3329	29.4632	34.728		B	C
C	30.7516	1.3329	28.1193	33.384			C
(C): control group, (BA): Bifidobacterium animalis subsp. Lactis BB-12 group, (LR): Lactobacillus rhamnosus GG group, (SB): Saccharomyces boulardii CNCM I-745 group.
Sex effect
Contrast	Difference	Standardized difference	Critical value	Pr > Diff	Significant
Male vs Female	8.86519	6.65105	1.9749	< 0,0001	Yes
Tukey's d critical value:			2.79293
Category	LS means	Standard error	Lower bound (95%)	Upper bound (95%)	Groups
Male	38.8394	0.942504	36.978	40.7007	A
Female	29.9742	0.942504	28.1128	31.8355		B
Day effect
Contrast	Difference	Standardized difference	Critical value	Pr > Diff	Significant
45 vs 0	4.91751	2.33333	2.75913	0.13982	No
45 vs 15	4.954	2.254	2.572	0.958	No
45 vs 60	0.8504	0.403511	2.75913	0.994371	No
45 vs 30	0.0584194	0.0277197	2.75913	1	No
30 vs 0	4.85909	2.30561	2.75913	0.148457	No
30 vs 15	3.47767	1.65014	2.75913	0.467849	No
30 vs 60	0.791981	0.375791	2.75913	0.995722	No
60 vs 0	4.06711	1.92982	2.75913	0.305874	No
60 vs 15	2.68569	1.27435	2.75913	0.707313	No
15 vs 0	1.38142	0.655477	2.75913	0.965397	No
Tukey's d critical value:			3.90201
Category	LS means	Standard error	Lower bound (95%)	Upper bound (95%)	Groups
45	36.2793	1.49023	33.3362	39.2223	A
30	36.2208	1.49023	33.2778	39.1639	A
60	35.4289	1.49023	32.4858	38.3719	A
15	32.7432	1.49023	29.8001	35.6862	A
0	31.3618	1.49023	28.4187	34.3048	A

## Sheet: Table S1G. UREA (g L)
Table S1G. Effects of dietary supplementation with probiotics on Blood UREA concentration of healthy rabbits.
Summary of the effects	Group (G)	*	Sex (S)	***	Day (D)	**	G x S	ns	G x D	ns	SxD	ns	GxSxD	ns
Significance::* P<0.05;**: P<0.01;***:P<0.001; ns: not significant
Details of all the effects
Group effect
Contrast	Difference	Standardized difference	Critical value	Pr > Diff	Significant
SB vs C	0.199311	2.66747	2.59624	0.0415382	Yes
SB vs LR	0.1858	2.48664	2.59624	0.065851	No
SB vs BA	0.0804555	1.07677	2.59624	0.704187	No
BA vs C	0.118855	1.5907	2.59624	0.386827	No
BA vs LR	0.105345	1.40987	2.59624	0.495051	No
LR vs C	0.013511	0.180824	2.59624	0.997893	No
Tukey's d critical value:			3.67163
Category	LS means	Standard error	Lower bound (95%)	Upper bound (95%)	Groups
SB	2.3688	0.0528345	2.26446	2.47314	A
BA	2.28834	0.0528345	2.184	2.39269	A	B
LR	2.183	0.0528345	2.07866	2.28734	A	B
C	2.16949	0.0528345	2.06515	2.27383		B
(C): control group, (BA): Bifidobacterium animalis subsp. Lactis BB-12 group, (LR): Lactobacillus rhamnosus GG group, (SB): Saccharomyces boulardii CNCM I-745 group.
Sex effect
Contrast	Difference	Standardized difference	Critical value	Pr > Diff	Significant
Male vs Female	0.238576	4.51554	1.9749	< 0,0001	Yes
Tukey's d critical value:			2.79293
Category	LS means	Standard error	Lower bound (95%)	Upper bound (95%)	Groups
Male	2.3717	0.0373596	2.29791	2.44548	A
Female	2.13312	0.0373596	2.05934	2.2069		B
Day effect
Contrast	Difference	Standardized difference	Critical value	Pr > Diff	Significant					:
30 vs 0	0.29012	3.47289	2.75913	0.00589409	Yes
30 vs 15	0.22656	2.71204	2.75913	0.056565	No
30 vs 60	0.0766898	0.918016	2.75913	0.889618	No
30 vs 45	0.00643979	0.0770876	2.75913	0.999992	No
45 vs 0	0.283681	3.3958	2.75913	0.0075976	Yes
45 vs 15	0.22012	2.63495	2.75913	0.0688741	No
45 vs 60	0.07025	0.840928	2.75913	0.917409	No
60 vs 0	0.213431	2.55487	2.75913	0.0839371	No
60 vs 15	0.14987	1.79403	2.75913	0.380649	No
15 vs 0	0.0635602	0.760848	2.75913	0.941339	No
Tukey's d critical value:			3.90201
Category	LS means	Standard error	Lower bound (95%)	Upper bound (95%)	Groups
30	2.37237	0.0590707	2.25571	2.48903	A
45	2.36593	0.0590707	2.24927	2.48259	A
60	2.29568	0.0590707	2.17902	2.41234	A	B
15	2.14581	0.0590707	2.02915	2.26247	A	B
0	2.08225	0.0590707	1.96559	2.19891		B

## Sheet: Table S1H. CREA (mg L)
Table S1H. Effects of dietary supplementation with probiotics on Blood creatinine concentration of healthy rabbits.
Summary of the effects	Group (G)	ns	Sex (S)	**	Day (D)	ns	G x S	ns	G x D	ns	SxD	ns	GxSxD	ns
Significance::**: P<0.01; ns: not significant
Details of all the effects
Group effect
Contrast	Difference	Standardized difference	Critical value	Pr > Diff	Significant
SB vs BA	0.660267	1.9513	2.59624	0.211077	No
SB vs C	0.483734	1.42959	2.59624	0.482821	No
SB vs LR	0.3322	0.981757	2.59624	0.760043	No
LR vs BA	0.328067	0.969543	2.59624	0.766949	No
LR vs C	0.151534	0.447831	2.59624	0.96996	No
C vs BA	0.176533	0.521711	2.59624	0.953762	No
Tukey's d critical value:			3.67163
Category	LS means	Standard error	Lower bound (95%)	Upper bound (95%)	Groups
SB	12.5746	0.239266	12.1021	13.0471	A
LR	12.2424	0.239266	11.7699	12.7149	A
C	12.0909	0.239266	11.6183	12.5634	A
BA	11.9143	0.239266	11.4418	12.3869	A
(C): control group, (BA): Bifidobacterium animalis subsp. Lactis BB-12 group, (LR): Lactobacillus rhamnosus GG group, (SB): Saccharomyces boulardii CNCM I-745 group.
Sex effect
Contrast	Difference	Standardized difference	Critical value	Pr > Diff	Significant
Male vs Female	0.789745	3.3007	1.9749	0.00118922	Yes
Tukey's d critical value:			2.79293
Category	LS means	Standard error	Lower bound (95%)	Upper bound (95%)	Groups
Male	12.6004	0.169186	12.2663	12.9345	A
Female	11.8107	0.169186	11.4766	12.1448		B
Day effect
Contrast	Difference	Standardized difference	Critical value	Pr > Diff	Significant
60 vs 0	0.855416	2.26114	2.75913	0.163141	No
60 vs 15	0.801277	2.11803	2.75913	0.217526	No
60 vs 30	0.731639	1.93395	2.75913	0.303736	No
60 vs 45	0.40225	1.06327	2.75913	0.824997	No
45 vs 0	0.453166	1.19786	2.75913	0.752617	No
45 vs 15	0.399027	1.05476	2.75913	0.829202	No
45 vs 30	0.329389	0.870679	2.75913	0.907236	No
30 vs 0	0.123777	0.327183	2.75913	0.997502	No
30 vs 15	0.0696387	0.184077	2.75913	0.999741	No
15 vs 0	0.0541387	0.143106	2.75913	0.999905	No
Tukey's d critical value:			3.90201
Category	LS means	Standard error	Lower bound (95%)	Upper bound (95%)	Groups
60	12.7637	0.267507	12.2354	13.292	A
45	12.3614	0.267507	11.8331	12.8897	A
30	12.032	0.267507	11.5037	12.5603	A
15	11.9624	0.267507	11.4341	12.4907	A
0	11.9082	0.267507	11.3799	12.4366	A

## Sheet: Table S1I. ALT (UI L)
Table S1I. Effects of dietary supplementation with probiotics on Blood ALT concentration of healthy rabbits.
Summary of the effects	Group (G)	ns	Sex (S)	ns	Day (D)	ns	G x S	ns	G x D	ns	SxD	ns	GxSxD	ns
ns: not significant
Details of all the effects
Group effect
Contrast	Difference	Standardized difference	Critical value	Pr > Diff	Significant
BA vs SB	2.40892	0.925346	2.59624	0.791323	No
BA vs LR	1.35752	0.521469	2.59624	0.953822	No
BA vs C	0.923279	0.354662	2.59624	0.984653	No
C vs SB	1.48564	0.570684	2.59624	0.940673	No
C vs LR	0.434243	0.166807	2.59624	0.998343	No
LR vs SB	1.0514	0.403877	2.59624	0.977653	No
Tukey's d critical value:			3.67163
Category	LS means	Standard error	Lower bound (95%)	Upper bound (95%)	Groups
BA	47.1511	1.84079	43.5157	50.7865	A
C	46.2278	1.84079	42.5925	49.8632	A
LR	45.7936	1.84079	42.1582	49.429	A
SB	44.7422	1.84079	41.1068	48.3776	A
(C): control group, (BA): Bifidobacterium animalis subsp. Lactis BB-12 group, (LR): Lactobacillus rhamnosus GG group, (SB): Saccharomyces boulardii CNCM I-745 group.
Sex effect
Contrast	Difference	Standardized difference	Critical value	Pr > Diff	Significant
Female vs Male	1.83169	0.995057	1.9749	0.321211	No
Tukey's d critical value:			2.79293
Category	LS means	Standard error	Lower bound (95%)	Upper bound (95%)	Groups
Female	46.8945	1.30163	44.3239	49.4651	A
Male	45.0628	1.30163	42.4923	47.6334	A
Day effect
Contrast	Difference	Standardized difference	Critical value	Pr > Diff	Significant
30 vs 0	0.530685	0.182332	2.75913	0.99975	No
30 vs 60	0.238033	0.081783	2.75913	0.99999	No
30 vs 45	0.231533	0.0795498	2.75913	0.999991	No
30 vs 15	0.0209673	0.00720392	2.75913	1	No
15 vs 0	0.509717	0.175128	2.75913	0.999787	No
15 vs 60	0.217065	0.0745791	2.75913	0.999993	No
15 vs 45	0.210565	0.0723459	2.75913	0.999994	No
45 vs 0	0.299152	0.102782	2.75913	0.999975	No
45 vs 60	0.0065	0.00223326	2.75913	1	No
60 vs 0	0.292652	0.100549	2.75913	0.999977	No
Tukey's d critical value:			3.90201
Category	LS means	Standard error	Lower bound (95%)	Upper bound (95%)	Groups
30	46.1829	2.05806	42.1185	50.2474	A
15	46.162	2.05806	42.0975	50.2264	A
45	45.9514	2.05806	41.8869	50.0159	A
60	45.9449	2.05806	41.8804	50.0094	A
0	45.6523	2.05806	41.5878	49.7167	A

## Sheet: Table S1J. AST (UI L)
Table S1J. Effects of dietary supplementation with probiotics on Blood AST concentration of healthy rabbits.
Summary of the effects	Group (G)	ns	Sex (S)	ns	Day (D)	ns	G x S	***	G x D	ns	SxD	ns	GxSxD	ns
Significance:***:P<0.001; ns: not significant
Details of all the effects
Group effect
Contrast	Difference	Standardized difference	Critical value	Pr > Diff	Significant
SB vs LR	2.4306	1.12594	2.59624	0.674089	No
SB vs C	2.09829	0.971997	2.59624	0.765567	No
SB vs BA	1.9548	0.905531	2.59624	0.801914	No
BA vs LR	0.475797	0.220405	2.59624	0.996207	No
BA vs C	0.143483	0.0664663	2.59624	0.999894	No
C vs LR	0.332313	0.153939	2.59624	0.998695	No
Tukey's d critical value:			3.67163
Category	LS means	Standard error	Lower bound (95%)	Upper bound (95%)	Groups
SB	40.6752	1.52646	37.6606	43.6898	A
BA	38.7204	1.52646	35.7058	41.735	A
C	38.5769	1.52646	35.5623	41.5915	A
LR	38.2446	1.52646	35.23	41.2592	A
(C): control group, (BA): Bifidobacterium animalis subsp. Lactis BB-12 group, (LR): Lactobacillus rhamnosus GG group, (SB): Saccharomyces boulardii CNCM I-745 group.
Sex effect
Contrast	Difference	Standardized difference	Critical value	Pr > Diff	Significant
Male vs Female	0.648187	0.424635	1.9749	0.671673	No
Tukey's d critical value:			2.79293
Category	LS means	Standard error	Lower bound (95%)	Upper bound (95%)	Groups
Male	39.3784	1.07937	37.2467	41.51	A
Female	38.7302	1.07937	36.5985	40.8618	A
Day effect
Contrast	Difference	Standardized difference	Critical value	Pr > Diff	Significant
60 vs 0	2.02675	0.839739	2.75913	0.917801	No
60 vs 15	1.03089	0.427127	2.75913	0.992998	No
60 vs 30	0.779282	0.322879	2.75913	0.997628	No
60 vs 45	0.552925	0.229093	2.75913	0.999384	No
45 vs 0	1.47382	0.610646	2.75913	0.973242	No
45 vs 15	0.477964	0.198034	2.75913	0.999654	No
45 vs 30	0.226357	0.0937862	2.75913	0.999982	No
30 vs 0	1.24746	0.51686	2.75913	0.985573	No
30 vs 15	0.251607	0.104248	2.75913	0.999973	No
15 vs 0	0.995857	0.412612	2.75913	0.993868	No
Tukey's d critical value:			3.90201
Category	LS means	Standard error	Lower bound (95%)	Upper bound (95%)	Groups
60	39.9322	1.70663	36.5618	43.3027	A
45	39.3793	1.70663	36.0089	42.7498	A
30	39.153	1.70663	35.7825	42.5234	A
15	38.9014	1.70663	35.5309	42.2718	A
0	37.9055	1.70663	34.5351	41.2759	A
