# Supplementary material for: Influence of Three Probiotics Strains, Lactobacillus rhamnosus GG, Bifidobacterium animalis subsp. Lactis BB-12 and Saccharomyces boulardii CNCM I-745 on the Biochemical and Haematological Profiles and Body Weight of Healthy Rabbits
Source: Biology (Basel). 2021 Nov 17;10(11):1194. doi: 10.3390/biology10111194 (PMC8615081; doi:10.3390/biology10111194)
Supplement: Supplementary file 1 [file biology-10-01194-s001.zip › biology-1431328-supplementary_Table S2.xlsx]

## Sheet: Table S2A. Fe (mg L)
Table S2A. Effects of dietary supplementation with probiotics on Blood Iron concentration of healthy rabbits.
Summary of the effects	Group (G)	***	Sex (S)	**	Day (D)	***	G x S	***	G x D	ns	SxD	ns	GxSxD	ns
Significance:***:P<0.001; ns: not significant
Details of all the effects
Group effect
Contrast	Difference	Standardized difference	Critical value	Pr > Diff	Significant
LR vs C	0.294	4.847	2.596	< 0,0001	Yes
LR vs BA	0.193	3.187	2.596	0.009	Yes
LR vs SB	0.156	2.57	2.596	0.053	No
SB vs C	0.138	2.277	2.596	0.108	No
SB vs BA	0.037	0.616	2.596	0.927	No
BA vs C	0.101	1.661	2.596	0.348	No
Tukey's d critical value:			3.672
Category	LS means	Standard error	Lower bound (95%)	Upper bound (95%)	Groups
LR	1.784	0.043	1.699	1.869	A
SB	1.628	0.043	1.543	1.713	A	B
BA	1.591	0.043	1.506	1.676		B
C	1.49	0.043	1.405	1.575		B
(C): control group, (BA): Bifidobacterium animalis subsp. Lactis BB-12 group, (LR): Lactobacillus rhamnosus GG group, (SB): Saccharomyces boulardii CNCM I-745 group.
Sex effect
Contrast	Difference	Standardized difference	Critical value	Pr > Diff	Significant
Male vs Female	0.138	3.208	1.975	0.002	Yes
Tukey's d critical value:			2.793
Category	LS means	Standard error	Lower bound (95%)	Upper bound (95%)	Groups
Male	1.692	0.03	1.632	1.752	A
Female	1.554	0.03	1.495	1.614		B
Day effect
Contrast	Difference	Standardized difference	Critical value	Pr > Diff	Significant
45 vs 0	0.367	5.408	2.759	< 0,0001	Yes
45 vs 15	0.212	3.127	2.759	0.018	Yes
45 vs 30	0.057	0.834	2.759	0.92	No
45 vs 60	0.023	0.335	2.759	0.997	No
60 vs 0	0.344	5.073	2.759	< 0,0001	Yes
60 vs 15	0.189	2.791	2.759	0.046	Yes
60 vs 30	0.034	0.499	2.759	0.987	No
30 vs 0	0.31	4.575	2.759	< 0,0001	Yes
30 vs 15	0.156	2.293	2.759	0.153	No
15 vs 0	0.155	2.282	2.759	0.156	No
Tukey's d critical value:			3.902
Category	LS means	Standard error	Lower bound (95%)	Upper bound (95%)	Groups
45	1.755	0.048	1.66	1.85	A
60	1.732	0.048	1.637	1.827	A
30	1.698	0.048	1.604	1.793	A	B
15	1.543	0.048	1.448	1.638		B	C
0	1.388	0.048	1.293	1.483			C

## Sheet: Table S2B. Ca (mg L)
Table S2B. Effects of dietary supplementation with probiotics on Blood Calcium concentration of healthy rabbits.
Summary of the effects	Group (G)	***	Sex (S)	ns	Day (D)	***	G x S	***	G x D	ns	SxD	ns	GxSxD	ns
Significance:***:P<0.001; ns: not significant
Details of all the effects
Group effect
Contrast	Difference	Standardized difference	Critical value	Pr > Diff	Significant
LR vs C	11.3415	3.94541	2.59624	0.000682017	Yes
LR vs BA	8.29405	2.88529	2.59624	0.0228518	Yes
LR vs SB	5.0968	1.77304	2.59624	0.290131	No
SB vs C	6.2447	2.17237	2.59624	0.135428	No
SB vs BA	3.19725	1.11224	2.59624	0.682539	No
BA vs C	3.04745	1.06013	2.59624	0.714214	No
Tukey's d critical value:			3.67163
Category	LS means	Standard error	Lower bound (95%)	Upper bound (95%)	Groups
LR	83.3856	2.03265	79.3713	87.3999	A
SB	78.2888	2.03265	74.2745	82.3031	A	B
BA	75.0916	2.03265	71.0773	79.1058		B
C	72.0441	2.03265	68.0298	76.0584		B
(C): control group, (BA): Bifidobacterium animalis subsp. Lactis BB-12 group, (LR): Lactobacillus rhamnosus GG group, (SB): Saccharomyces boulardii CNCM I-745 group.
Sex effect
Contrast	Difference	Standardized difference	Critical value	Pr > Diff	Significant
Male vs Female	3.88797	1.91276	1.9749	0.0575651	No
Tukey's d critical value:			2.79293
Category	LS means	Standard error	Lower bound (95%)	Upper bound (95%)	Groups
Male	79.1465	1.4373	76.308	81.985	A
Female	75.2585	1.4373	72.42	78.0971	A
Day effect
Contrast	Difference	Standardized difference	Critical value	Pr > Diff	Significant
60 vs 0	17.6039	5.47743	2.75913	< 0,0001	Yes
60 vs 15	11.2936	3.51399	2.75913	0.00513689	Yes
60 vs 30	3.07681	0.957344	2.75913	0.873661	No
60 vs 45	1.1415	0.355176	2.75913	0.996562	No
45 vs 0	16.4624	5.12226	2.75913	< 0,0001	Yes
45 vs 30	1.93531	0.602169	2.75913	0.974576	No
30 vs 0	14.5271	4.52009	2.75913	0.000115807	Yes
30 vs 15	8.21681	2.55665	2.75913	0.0835769	No
15 vs 0	6.31031	1.96344	2.75913	0.288725	No
Tukey's d critical value:			3.90201
Category	LS means	Standard error	Lower bound (95%)	Upper bound (95%)	Groups
60	83.8257	2.27257	79.3376	88.3138	A
45	82.6842	2.27257	78.1961	87.1723	A
30	80.7489	2.27257	76.2608	85.237	A	B
15	72.5321	2.27257	68.044	77.0202		B	C
0	66.2217	2.27257	61.7336	70.7099			C

## Sheet: Table S2C. P (mg L)
Table S2C. Effects of dietary supplementation with probiotics on Blood phosphor concentration of healthy rabbits.
Summary of the effects	Group (G)	ns	Sex (S)	ns	Day (D)	ns	G x S	ns	G x D	ns	SxD	ns	GxSxD	ns
ns: not significant
Details of all the effects
Group effect
Contrast	Difference	Standardized difference	Critical value	Pr > Diff	Significant
BA vs SB	3.00381	1.48755	2.59624	0.447392	No
BA vs c	2.78899	1.38117	2.59624	0.512984	No
BA vs LR	2.67781	1.32611	2.59624	0.547714	No
LR vs SB	0.326	0.161442	2.59624	0.998497	No
LR vs C	0.111181	0.0550593	2.59624	0.99994	No
C vs SB	0.214819	0.106383	2.59624	0.999567	No
Tukey's d critical value:			3.67163
Category	LS means	Standard error	Lower bound (95%)	Upper bound (95%)	Groups
BA	48.5578	1.42786	45.7379	51.3777	A
LR	45.88	1.42786	43.0601	48.6999	A
C	45.7688	1.42786	42.9489	48.5887	A
SB	45.554	1.42786	42.7341	48.3739	A
(C): control group, (BA): Bifidobacterium animalis subsp. Lactis BB-12 group, (LR): Lactobacillus rhamnosus GG group, (SB): Saccharomyces boulardii CNCM I-745 group.
Sex effect
Contrast	Difference	Standardized difference	Critical value	Pr > Diff	Significant
Female vs Male	1.7151	1.20117	1.9749	0.23146	No
Tukey's d critical value:			2.79293
Category	LS means	Standard error	Lower bound (95%)	Upper bound (95%)	Groups
Female	47.2977	1.00965	45.3038	49.2917	A
Male	45.5826	1.00965	43.5886	47.5766	A
Day effect
Contrast	Difference	Standardized difference	Critical value	Pr > Diff	Significant
60 vs 0	5.04376	2.23408	2.75913	0.172579	No
60 vs 15	3.34201	1.48031	2.75913	0.576757	No
60 vs 30	2.0135	0.891861	2.75913	0.899569	No
60 vs 45	1.565	0.693201	2.75913	0.957719	No
45 vs 0	3.47876	1.54088	2.75913	0.537561	No
45 vs 15	1.77701	0.787107	2.75913	0.934043	No
45 vs 30	0.448504	0.19866	2.75913	0.999649	No
30 vs 0	3.03026	1.34222	2.75913	0.665284	No
30 vs 15	1.3285	0.588447	2.75913	0.976639	No
15 vs 0	1.70175	0.753774	2.75913	0.943214	No
Tukey's d critical value:			3.90201
Category	LS means	Standard error	Lower bound (95%)	Upper bound (95%)	Groups
60	48.833	1.5964	45.6803	51.9857	A
45	47.268	1.5964	44.1153	50.4207	A
30	46.8195	1.5964	43.6668	49.9722	A
15	45.491	1.5964	42.3383	48.6437	A
0	43.7892	1.5964	40.6365	46.942	A

## Sheet: Table S2D. Na (mmol L)
Table S2D. Effects of dietary supplementation with probiotics on Blood Sodium concentration of healthy rabbits.
Summary of the effects	Group (G)	**	Sex (S)	**	Day (D)	ns	G x S	ns	G x D	ns	SxD	ns	GxSxD	ns
Significance::**: P<0.01; ns: not significant
Details of all the effects
Group effect
Contrast	Difference	Standardized difference	Critical value	Pr > Diff	Significant
BA vs SB	5.51265	3.35601	2.59624	0.00540672	Yes
BA vs LR	3.04305	1.85256	2.59624	0.252873	No
BA vs C	0.249349	0.151799	2.59624	0.998749	No
C vs SB	5.2633	3.20421	2.59624	0.00879397	Yes
C vs LR	2.7937	1.70076	2.59624	0.32668	No
LR vs SB	2.4696	1.50345	2.59624	0.437831	No
Tukey's d critical value:			3.67163
Category	LS means	Standard error	Lower bound (95%)	Upper bound (95%)	Groups
BA	142.165	1.16151	139.872	144.459	A
C	141.916	1.16151	139.622	144.21	A
LR	139.122	1.16151	136.829	141.416	A	B
SB	136.653	1.16151	134.359	138.947		B
(C): control group, (BA): Bifidobacterium animalis subsp. Lactis BB-12 group, (LR): Lactobacillus rhamnosus GG group, (SB): Saccharomyces boulardii CNCM I-745 group.
Sex effect
Contrast	Difference	Standardized difference	Critical value	Pr > Diff	Significant
Male vs Female	3.75836	3.23576	1.9749	0.00147441	Yes
Tukey's d critical value:			2.79293
Category	LS means	Standard error	Lower bound (95%)	Upper bound (95%)	Groups
Male	141.843	0.82131	140.221	143.465	A
Female	138.085	0.82131	136.463	139.707		B
Day effect
Contrast	Difference	Standardized difference	Critical value	Pr > Diff	Significant
60 vs 15	1.13696	0.619089	2.75913	0.971867	No
60 vs 0	0.715064	0.389361	2.75913	0.995094	No
60 vs 45	0.649	0.353389	2.75913	0.996629	No
60 vs 30	0.490855	0.267276	2.75913	0.998869	No
30 vs 15	0.646105	0.351812	2.75913	0.996687	No
30 vs 0	0.224209	0.122085	2.75913	0.999949	No
30 vs 45	0.158145	0.0861121	2.75913	0.999987	No
45 vs 15	0.487959	0.2657	2.75913	0.998895	No
45 vs 0	0.0660641	0.0359727	2.75913	1	No
0 vs 15	0.421895	0.229727	2.75913	0.999377	No
Tukey's d critical value:			3.90201
Category	LS means	Standard error	Lower bound (95%)	Upper bound (95%)	Groups
60	140.563	1.29861	137.998	143.127	A
30	140.072	1.29861	137.507	142.636	A
45	139.914	1.29861	137.349	142.478	A
0	139.847	1.29861	137.283	142.412	A
15	139.426	1.29861	136.861	141.99	A

## Sheet: Table S2E. K (mmol L)
Table S2E. Effects of dietary supplementation with probiotics on Blood Potassium concentration of healthy rabbits.
Summary of the effects	Group (G)	*	Sex (S)	**	Day (D)	**	G x S	ns	G x D	ns	SxD	ns	GxSxD	ns
Significance::* P<0.05;**: P<0.01; ns: not significant
Details of all the effects
Group effect
Contrast	Difference	Standardized difference	Critical value	Pr > Diff	Significant
BA vs C	0.132645	3.12932	2.59624	0.0110961	Yes
BA vs SB	0.081155	1.91458	2.59624	0.226035	No
BA vs LR	0.047955	1.13134	2.59624	0.670744	No
LR vs C	0.0846901	1.99798	2.59624	0.19306	No
LR vs SB	0.0332	0.783244	2.59624	0.861973	No
SB vs C	0.0514901	1.21474	2.59624	0.618423	No
Tukey's d critical value:			3.67163
Category	LS means	Standard error	Lower bound (95%)	Upper bound (95%)	Groups
BA	3.94135	0.0299727	3.88216	4.00055	A
LR	3.8934	0.0299727	3.83421	3.95259	A	B
SB	3.8602	0.0299727	3.80101	3.91939	A	B
C	3.80871	0.0299727	3.74952	3.8679		B
(C): control group, (BA): Bifidobacterium animalis subsp. Lactis BB-12 group, (LR): Lactobacillus rhamnosus GG group, (SB): Saccharomyces boulardii CNCM I-745 group.
Sex effect
Contrast	Difference	Standardized difference	Critical value	Pr > Diff	Significant
Male vs Female	0.0964408	3.21762	1.9749	0.00156475	Yes
Tukey's d critical value:			2.79293
Category	LS means	Standard error	Lower bound (95%)	Upper bound (95%)	Groups
Male	3.92414	0.0211939	3.88228	3.96599	A
Female	3.8277	0.0211939	3.78584	3.86955		B
Day effect
Contrast	Difference	Standardized difference	Critical value	Pr > Diff	Significant
45 vs 0	0.165694	3.49631	2.75913	0.00545088	Yes
45 vs 60	0.03525	0.743812	2.75913	0.945789	No
45 vs 15	0.0177958	0.37551	2.75913	0.995735	No
15 vs 0	0.147898	3.1208	2.75913	0.0179849	Yes
15 vs 60	0.0174542	0.368302	2.75913	0.996043	No
15 vs 30	0.00735209	0.155137	2.75913	0.999869	No
30 vs 0	0.140546	2.96566	2.75913	0.0283343	Yes
30 vs 60	0.0101021	0.213165	2.75913	0.999537	No
60 vs 0	0.130444	2.7525	2.75913	0.050884	No
Tukey's d critical value:			3.90201
Category	LS means	Standard error	Lower bound (95%)	Upper bound (95%)	Groups
45	3.92469	0.0335105	3.85851	3.99087	A
15	3.9069	0.0335105	3.84072	3.97308	A
30	3.89955	0.0335105	3.83337	3.96573	A
60	3.88944	0.0335105	3.82326	3.95562	A	B
0	3.759	0.0335105	3.69282	3.82518		B
