# Supplementary material for: Influence of Three Probiotics Strains, Lactobacillus rhamnosus GG, Bifidobacterium animalis subsp. Lactis BB-12 and Saccharomyces boulardii CNCM I-745 on the Biochemical and Haematological Profiles and Body Weight of Healthy Rabbits
Source: Biology (Basel). 2021 Nov 17;10(11):1194. doi: 10.3390/biology10111194 (PMC8615081; doi:10.3390/biology10111194)
Supplement: Supplementary file 1 [file biology-10-01194-s001.zip › biology-1431328-supplementary_Table S3.xlsx]

## Sheet: Table S3A. RBC
Table S3A. Effects of dietary supplementation with probiotics on Erythrocytes count of healthy rabbits.
Summary of the effects	Group (G)	***	Sex (S)	*	Day (D)	***	G x S	ns	G x D	**	SxD	ns	GxSxD	**
Significance::* P<0.05;**: P<0.01;***:P<0.001; ns: not significant
Details of all the effects
Group effect
Contrast	Difference	Standardized difference	Critical value	Pr > Diff	Significant
LR vs C	0.888806	7.71183	2.59624	< 0,0001	Yes
LR vs BA	0.767603	6.6602	2.59624	< 0,0001	Yes
LR vs SB	0.5118	4.44069	2.59624	< 0,0001	Yes
SB vs C	0.377006	3.27114	2.59624	0.00711406	Yes
SB vs BA	0.255803	2.21951	2.59624	0.122356	No
BA vs C	0.121203	1.05163	2.59624	0.719296	No
Tukey's d critical value:			3.67163
Category	LS means	Standard error	Lower bound (95%)	Upper bound (95%)	Groups
LR	5.642	0.0814957	5.48105	5.80295	A
SB	5.1302	0.0814957	4.96925	5.29115		B
BA	4.8744	0.0814957	4.71345	5.03534		B	C
C	4.75319	0.0814957	4.59225	4.91414			C
(C): control group, (BA): Bifidobacterium animalis subsp. Lactis BB-12 group, (LR): Lactobacillus rhamnosus GG group, (SB): Saccharomyces boulardii CNCM I-745 group.
Sex effect
Contrast	Difference	Standardized difference	Critical value	Pr > Diff	Significant
Female vs Male	0.184499	2.26392	1.9749	0.0249228	Yes
Tukey's d critical value:			2.79293
Category	LS means	Standard error	Lower bound (95%)	Upper bound (95%)	Groups
Female	5.1922	0.0576262	5.07839	5.306	A
Male	5.0077	0.0576262	4.89389	5.1215		B
Day effect
Contrast	Difference	Standardized difference	Critical value	Pr > Diff	Significant
60 vs 15	0.910497	7.06601	2.75913	< 0,0001	Yes
60 vs 0	0.881746	6.84288	2.75913	< 0,0001	Yes
60 vs 30	0.569749	4.42159	2.75913	0.000173616	Yes
60 vs 45	0.19575	1.51914	2.75913	0.551614	No
45 vs 15	0.714747	5.54687	2.75913	< 0,0001	Yes
45 vs 0	0.685996	5.32374	2.75913	< 0,0001	Yes
45 vs 30	0.373999	2.90245	2.75913	0.0338684	Yes
30 vs 15	0.340749	2.64441	2.75913	0.0672527	No
30 vs 0	0.311997	2.42129	2.75913	0.114934	No
0 vs 15	0.0287513	0.223127	2.75913	0.999445	No
Tukey's d critical value:			3.90201
Category	LS means	Standard error	Lower bound (95%)	Upper bound (95%)	Groups
60	5.6115	0.0911149	5.43155	5.79144	A
45	5.41575	0.0911149	5.2358	5.59569	A
30	5.04175	0.0911149	4.8618	5.22169		B
0	4.72975	0.0911149	4.54981	4.90969		B
15	4.701	0.0911149	4.52106	4.88094		B

## Sheet: Table S3B. HGB
Table S3B. Effects of dietary supplementation with probiotics on Blood hemoglobin concentration of healthy rabbits.
Summary of the effects	Group (G)	***	Sex (S)	ns	Day (D)	**	G x S	**	G x D	***	SxD	ns	GxSxD	ns
Significance:**: P<0.01;***:P<0.001; ns: not significant
Details of all the effects
Group effect
Contrast	Difference	Standardized difference	Critical value	Pr > Diff	Significant
LR vs C	0.74169	6.70969	2.59624	< 0,0001	Yes
LR vs BA	0.627045	5.67255	2.59624	< 0,0001	Yes
LR vs SB	0.246	2.22544	2.59624	0.120783	No
SB vs C	0.49569	4.48425	2.59624	< 0,0001	Yes
SB vs BA	0.381045	3.44712	2.59624	0.00399957	Yes
BA vs C	0.114645	1.03713	2.59624	0.72791	No
Tukey's d critical value:			3.67163
Category	LS means	Standard error	Lower bound (95%)	Upper bound (95%)	Groups
LR	11.3996	0.0781637	11.2452	11.554	A
SB	11.1536	0.0781637	10.9992	11.308	A
BA	10.7726	0.0781637	10.6182	10.9269		B
C	10.6579	0.0781637	10.5035	10.8123		B
(C): control group, (BA): Bifidobacterium animalis subsp. Lactis BB-12 group, (LR): Lactobacillus rhamnosus GG group, (SB): Saccharomyces boulardii CNCM I-745 group.
Sex effect
Contrast	Difference	Standardized difference	Critical value	Pr > Diff	Significant
Female vs Male	0.0595592	0.76198	1.9749	0.447194	No
Tukey's d critical value:			2.79293
Category	LS means	Standard error	Lower bound (95%)	Upper bound (95%)	Groups
Female	11.0257	0.0552701	10.9165	11.1348	A
Male	10.9661	0.0552701	10.857	11.0753	A
Day effect
Contrast	Difference	Standardized difference	Critical value	Pr > Diff	Significant
60 vs 0	0.763694	6.17937	2.75913	< 0,0001	Yes
60 vs 15	0.742046	6.00421	2.75913	< 0,0001	Yes
60 vs 30	0.435898	3.52703	2.75913	0.00491603	Yes
60 vs 45	0.0835	0.675634	2.75913	0.96142	No
45 vs 0	0.680194	5.50373	2.75913	< 0,0001	Yes
45 vs 15	0.658546	5.32857	2.75913	< 0,0001	Yes
45 vs 30	0.352398	2.8514	2.75913	0.0390036	Yes
30 vs 0	0.327796	2.65233	2.75913	0.0659199	No
30 vs 15	0.306148	2.47717	2.75913	0.101017	No
15 vs 0	0.0216479	0.175162	2.75913	0.999787	No
Tukey's d critical value:			3.90201
Category	LS means	Standard error	Lower bound (95%)	Upper bound (95%)	Groups
60	11.4009	0.0873897	11.2284	11.5735	A
45	11.3174	0.0873897	11.1449	11.49	A
30	10.965	0.0873897	10.7925	11.1376		B
15	10.6589	0.0873897	10.4863	10.8315		B
0	10.6372	0.0873897	10.4647	10.8098		B

## Sheet: Table S3C. HCT
Table S3C. Effects of dietary supplementation with probiotics on Hematocrit value of healthy rabbits.
Summary of the effects	Group (G)	ns	Sex (S)	**	Day (D)	ns	G x S	ns	G x D	ns	SxD	ns	GxSxD	ns
Significance::**P<0.01; ns: not significant
Details of all the effects
Group effect
Contrast	Difference	Standardized difference	Critical value	Pr > Diff	Significant
SB vs C	0.875822	1.97678	2.59624	0.201104	No
SB vs BA	0.446911	1.0087	2.59624	0.744568	No
SB vs LR	0.042	0.0947964	2.59624	0.999694	No
LR vs C	0.833822	1.88198	2.59624	0.239895	No
LR vs BA	0.404911	0.913907	2.59624	0.797463	No																		Contrast	Difference	Standardized difference	Critical value	Pr > Diff	Significant
BA vs C	0.428911	0.968076	2.59624	0.767774	No																		Male vs Female	1.07115	3.41907	1.9749	0.0007972	Yes
Tukey's d critical value:			3.67163																				Tukey's d critical value:			2.79293
Category	LS means	Standard error	Lower bound (95%)	Upper bound (95%)	Groups																		Category	LS means	Standard error	Lower bound (95%)	Upper bound (95%)	Groups
SB	33.526	0.313287	32.9073	34.1447	A																		Male	33.7204	0.221527	33.2829	34.1579	A
LR	33.484	0.313287	32.8653	34.1027	A																		Female	32.6492	0.221527	32.2117	33.0867		B
BA	33.0791	0.313287	32.4604	33.6978	A
C	32.6502	0.313287	32.0315	33.2689	A
(C): control group, (BA): Bifidobacterium animalis subsp. Lactis BB-12 group, (LR): Lactobacillus rhamnosus GG group, (SB): Saccharomyces boulardii CNCM I-745 group.
Sex effect
Contrast	Difference	Standardized difference	Critical value	Pr > Diff	Significant
Male vs Female	1.07115	3.41907	1.9749	0.0007972	Yes
Tukey's d critical value:			2.79293
Category	LS means	Standard error	Lower bound (95%)	Upper bound (95%)	Groups
Male	33.7204	0.221527	33.2829	34.1579	A
Female	32.6492	0.221527	32.2117	33.0867		B
Day effect
Contrast	Difference	Standardized difference	Critical value	Pr > Diff	Significant
60 vs 0	1.13886	2.2991	2.75913	0.150543	No
60 vs 15	0.809241	1.63367	2.75913	0.478214	No
60 vs 30	0.35212	0.710851	2.75913	0.953774	No
60 vs 45	0.2075	0.418895	2.75913	0.993502	No
45 vs 0	0.931361	1.88021	2.75913	0.332207	No
45 vs 15	0.601741	1.21478	2.75913	0.74282	No
45 vs 30	0.14462	0.291956	2.75913	0.9984	No
30 vs 0	0.786741	1.58825	2.75913	0.5071	No
30 vs 15	0.45712	0.922822	2.75913	0.887732	No
15 vs 0	0.32962	0.665429	2.75913	0.963469	No
Tukey's d critical value:			3.90201
Category	LS means	Standard error	Lower bound (95%)	Upper bound (95%)	Groups
60	33.6864	0.350266	32.9946	34.3781	A
45	33.4789	0.350266	32.7871	34.1706	A
30	33.3342	0.350266	32.6425	34.026	A
15	32.8771	0.350266	32.1854	33.5689	A
0	32.5475	0.350266	31.8558	33.2392	A

## Sheet: Table S3D. WBC
Table S3D. Effects of dietary supplementation with probiotics on White blood cell count of healthy rabbits.
Summary of the effects	Group (G)	***	Sex (S)	***	Day (D)	***	G x S	ns	G x D	*	SxD	ns	GxSxD	ns
Significance::* P<0.05;**: ***:P<0.001; ns: not significant
Details of all the effects
Group effect
Contrast	Difference	Standardized difference	Critical value	Pr > Diff	Significant
LR vs C	1.80145	7.96771	2.59624	< 0,0001	Yes
LR vs BA	1.41543	6.26034	2.59624	< 0,0001	Yes
LR vs SB	1.1206	4.95634	2.59624	< 0,0001	Yes
SB vs C	0.680852	3.01137	2.59624	0.015841	Yes
SB vs BA	0.294826	1.304	2.59624	0.56174	No
BA vs C	0.386026	1.70737	2.59624	0.323235	No
Tukey's d critical value:			3.67163
Category	LS means	Standard error	Lower bound (95%)	Upper bound (95%)	Groups
LR	8.5306	0.159873	8.21487	8.84633	A
SB	7.41	0.159873	7.09427	7.72573		B
BA	7.11517	0.159873	6.79944	7.43091		B	C
C	6.72915	0.159873	6.41341	7.04488			C
(C): control group, (BA): Bifidobacterium animalis subsp. Lactis BB-12 group, (LR): Lactobacillus rhamnosus GG group, (SB): Saccharomyces boulardii CNCM I-745 group.
Sex effect
Contrast	Difference	Standardized difference	Critical value	Pr > Diff	Significant
Male vs Female	1.07115	3.41907	1.9749	0.0007972	Yes
Tukey's d critical value:			2.79293
Category	LS means	Standard error	Lower bound (95%)	Upper bound (95%)	Groups
Female	7.90961	0.113047	7.68635	8.13287	A
Male	6.98285	0.113047	6.75959	7.20611		B
Day effect
Contrast	Difference	Standardized difference	Critical value	Pr > Diff	Significant
30 vs 0	1.04181	4.1214	2.75913	0.000571312	Yes
30 vs 15	0.549406	2.17345	2.75913	0.195154	No
30 vs 60	0.0460942	0.182349	2.75913	0.99975	No
30 vs 45	0.00934424	0.0369658	2.75913	1	No
45 vs 0	1.03247	4.08444	2.75913	0.00065851	Yes
45 vs 15	0.540062	2.13648	2.75913	0.209892	No
45 vs 60	0.03675	0.145383	2.75913	0.999899	No
60 vs 0	0.995717	3.93905	2.75913	0.0011396	Yes
60 vs 15	0.503312	1.9911	2.75913	0.275052	No
15 vs 0	0.492406	1.94796	2.75913	0.296553	No
Tukey's d critical value:			3.90201
Category	LS means	Standard error	Lower bound (95%)	Upper bound (95%)	Groups
30	7.77556	0.178743	7.42256	8.12856	A
45	7.76622	0.178743	7.41322	8.11922	A
60	7.72947	0.178743	7.37647	8.08247	A
15	7.22616	0.178743	6.87316	7.57916	A	B
0	6.73375	0.178743	6.38075	7.08675		B

## Sheet: Table S3E. LYMPHO ≠
Table S3E. Effects of dietary supplementation with probiotics on Lymphocyte count of healthy rabbits.
Summary of the effects	Group (G)	ns	Sex (S)	ns	Day (D)	ns	G x S	**	G x D	ns	SxD	ns	GxSxD	ns
ns: not significant
Details of all the effects
Group effect
Contrast	Difference	Standardized difference	Critical value	Pr > Diff	Significant
LR vs C	0.710213	2.36805	2.59624	0.0874978	No
LR vs BA	0.692157	2.30784	2.59624	0.100517	No
LR vs SB	0.3534	1.17833	2.59624	0.641393	No
SB vs C	0.356813	1.18971	2.59624	0.63423	No
SB vs BA	0.338757	1.12951	2.59624	0.671878	No
BA vs C	0.0180565	0.0602056	2.59624	0.999921	No
Tukey's d critical value:			3.67163
Category	LS means	Standard error	Lower bound (95%)	Upper bound (95%)	Groups
LR	5.613	0.212072	5.19418	6.03182	A
SB	5.2596	0.212072	4.84078	5.67842	A
BA	4.92084	0.212072	4.50202	5.33966	A
C	4.90279	0.212072	4.48397	5.32161	A
(C): control group, (BA): Bifidobacterium animalis subsp. Lactis BB-12 group, (LR): Lactobacillus rhamnosus GG group, (SB): Saccharomyces boulardii CNCM I-745 group.
Sex effect
Contrast	Difference	Standardized difference	Critical value	Pr > Diff	Significant
Female vs Male	0.344491	1.62441	1.9749	0.106258	No
Tukey's d critical value:			2.79293
Category	LS means	Standard error	Lower bound (95%)	Upper bound (95%)	Groups
Female	5.3463	0.149957	5.05015	5.64245	A
Male	5.00181	0.149957	4.70566	5.29796	A
Day effect
Contrast	Difference	Standardized difference	Critical value	Pr > Diff	Significant
30 vs 0	0.272203	0.811783	2.75913	0.926699	No
30 vs 60	0.238899	0.71246	2.75913	0.953403	No
30 vs 45	0.186274	0.555518	2.75913	0.981117	No
30 vs 15	0.0408514	0.12183	2.75913	0.99995	No
15 vs 0	0.231351	0.689953	2.75913	0.95842	No
15 vs 60	0.198047	0.59063	2.75913	0.976319	No
15 vs 45	0.145422	0.433688	2.75913	0.992578	No
45 vs 0	0.0859293	0.256264	2.75913	0.999041	No
45 vs 60	0.052625	0.156942	2.75913	0.999862	No
60 vs 0	0.0333043	0.0993225	2.75913	0.999978	No
Tukey's d critical value:			3.90201
Category	LS means	Standard error	Lower bound (95%)	Upper bound (95%)	Groups
30	5.3217	0.237104	4.85345	5.78996	A
15	5.28085	0.237104	4.8126	5.74911	A
45	5.13543	0.237104	4.66717	5.60369	A
60	5.0828	0.237104	4.61455	5.55106	A
0	5.0495	0.237104	4.58124	5.51776	A

## Sheet: Table S3F. MONO≠ 
Table S3F. Effects of dietary supplementation with probiotics on Monocyte count of healthy rabbits.
Summary of the effects	Group (G)	ns	Sex (S)	ns	Day (D)	ns	G x S	ns	G x D	ns	SxD	ns	GxSxD	ns
Significance::* P<0.05;**: P<0.01;***:P<0.001; ns: not significant
Details of all the effects
Group effect
Contrast	Difference	Standardized difference	Critical value	Pr > Diff	Significant
BA vs SB	0.819462	1.42165	2.59624	0.487735	No
BA vs C	0.808338	1.40235	2.59624	0.499734	No
BA vs LR	0.755262	1.31027	2.59624	0.557756	No
LR vs SB	0.0642	0.111378	2.59624	0.999504	No
LR vs C	0.0530764	0.0920802	2.59624	0.999719	No
C vs SB	0.0111236	0.0192978	2.59624	0.999997	No
Tukey's d critical value:			3.67163
Category	LS means	Standard error	Lower bound (95%)	Upper bound (95%)	Groups
BA	1.16346	0.407587	0.358517	1.96841	A
LR	0.4082	0.407587	-0.396745	1.21314	A
C	0.355124	0.407587	-0.449821	1.16007	A
SB	0.344	0.407587	-0.460945	1.14894	A
(C): control group, (BA): Bifidobacterium animalis subsp. Lactis BB-12 group, (LR): Lactobacillus rhamnosus GG group, (SB): Saccharomyces boulardii CNCM I-745 group.
Sex effect
Contrast	Difference	Standardized difference	Critical value	Pr > Diff	Significant
Female vs Male	0.381377	0.935694	1.9749	0.350841	No
Tukey's d critical value:			2.79293
Category	LS means	Standard error	Lower bound (95%)	Upper bound (95%)	Groups
Female	0.758385	0.288208	0.189203	1.32757	A
Male	0.377008	0.288208	-0.192174	0.94619	A
Day effect
Contrast	Difference	Standardized difference	Critical value	Pr > Diff	Significant
15 vs 0	1.10494	1.71455	2.75913	0.427982	No
15 vs 60	0.992115	1.53947	2.75913	0.538471	No
15 vs 45	0.981615	1.52318	2.75913	0.549001	No
15 vs 30	0.972558	1.50912	2.75913	0.558096	No
30 vs 0	0.132385	0.205422	2.75913	0.9996	No
30 vs 60	0.0195576	0.0303476	2.75913	1	No
30 vs 45	0.00905759	0.0140547	2.75913	1	No
45 vs 0	0.123327	0.191368	2.75913	0.999698	No
45 vs 60	0.0105	0.0162929	2.75913	1	No
60 vs 0	0.112827	0.175075	2.75913	0.999788	No
Tukey's d critical value:			3.90201
Category	LS means	Standard error	Lower bound (95%)	Upper bound (95%)	Groups
15	1.37794	0.455696	0.477987	2.2779	A
30	0.405385	0.455696	-0.494571	1.30534	A
45	0.396327	0.455696	-0.503628	1.29628	A
60	0.385827	0.455696	-0.514128	1.28578	A
0	0.273	0.455696	-0.626956	1.17296	A

## Sheet: Table S3G. NEUT≠
Table S3G. Effects of dietary supplementation with probiotics on Neutrophile count of healthy rabbits.
Summary of the effects	Group (G)	***	Sex (S)	**	Day (D)	***	G x S	**	G x D	***	SxD	ns	GxSxD	ns
Significance::* P<0.05;**: P<0.01;***:P<0.001; ns: not significant
Details of all the effects
Group effect
Contrast	Difference	Standardized difference	Critical value	Pr > Diff	Significant
LR vs C	0.956305	12.2388	2.59624	< 0,0001	Yes
LR vs SB	0.679	8.68987	2.59624	< 0,0001	Yes
LR vs BA	0.662052	8.47297	2.59624	< 0,0001	Yes
BA vs C	0.294252	3.76585	2.59624	0.00131982	Yes
BA vs SB	0.0169476	0.216897	2.59624	0.996383	No
SB vs C	0.277305	3.54896	2.59624	0.00283198	Yes
Tukey's d critical value:			3.67163
Category	LS means	Standard error	Lower bound (95%)	Upper bound (95%)	Groups
LR	2.4968	0.0552512	2.38768	2.60592	A
BA	1.83475	0.0552512	1.72563	1.94386		B
SB	1.8178	0.0552512	1.70868	1.92692		B
C	1.5405	0.0552512	1.43138	1.64961			C
(C): control group, (BA): Bifidobacterium animalis subsp. Lactis BB-12 group, (LR): Lactobacillus rhamnosus GG group, (SB): Saccharomyces boulardii CNCM I-745 group.
Sex effect
Contrast	Difference	Standardized difference	Critical value	Pr > Diff	Significant
Male vs Female	0.171475	3.10356	1.9749	0.00226141	Yes
Tukey's d critical value:			2.79293
Category	LS means	Standard error	Lower bound (95%)	Upper bound (95%)	Groups
Male	2.0082	0.0390685	1.93104	2.08535	A
Female	1.83672	0.0390685	1.75957	1.91388		B
Day effect
Contrast	Difference	Standardized difference	Critical value	Pr > Diff	Significant
45 vs 0	0.952435	10.9024	2.75913	< 0,0001	Yes
45 vs 15	0.790123	9.04447	2.75913	< 0,0001	Yes
45 vs 30	0.190312	2.17848	2.75913	0.193205	No
45 vs 60	0.01825	0.208906	2.75913	0.999572	No
60 vs 0	0.934185	10.6935	2.75913	< 0,0001	Yes
60 vs 15	0.771873	8.83556	2.75913	< 0,0001	Yes
60 vs 30	0.172062	1.96957	2.75913	0.285659	No
30 vs 0	0.762123	8.72396	2.75913	< 0,0001	Yes
30 vs 15	0.599812	6.86599	2.75913	< 0,0001	Yes
15 vs 0	0.162312	1.85797	2.75913	0.344393	No
Tukey's d critical value:			3.90201
Category	LS means	Standard error	Lower bound (95%)	Upper bound (95%)	Groups
45	2.31268	0.0617727	2.19069	2.43468	A
60	2.29443	0.0617727	2.17244	2.41643	A
30	2.12237	0.0617727	2.00038	2.24437	A
15	1.52256	0.0617727	1.40057	1.64456		B
0	1.36025	0.0617727	1.23825	1.48225		B

## Sheet: Table S3H. EO≠
Table S3H. Effects of dietary supplementation with probiotics on Eosinophile count of healthy rabbits.
Summary of the effects	Group (G)	ns	Sex (S)	ns	Day (D)	**	G x S	ns	G x D	ns	SxD	ns	GxSxD	ns
Significance::**: P<0.01;***; ns: not significant
Details of all the effects
Group effect
Contrast	Difference	Standardized difference	Critical value	Pr > Diff	Significant
C vs LR	0.0201099	1.3739	2.59624	0.517544	No
C vs SB	0.0163099	1.11429	2.59624	0.681277	No
C vs BA	0.00515497	0.352186	2.59624	0.984962	No															Sex / Tukey (HSD) / Analysis of the differences between the categories with a confidence interval of 95% (Eosinophile count):
BA vs LR	0.014955	1.02172	2.59624	0.736982	No
BA vs SB	0.011155	0.762104	2.59624	0.871336	No
SB vs LR	0.0038	0.259615	2.59624	0.993846	No
Tukey's d critical value:			3.67163
Category	LS means	Standard error	Lower bound (95%)	Upper bound (95%)	Groups
C	0.0563099	0.01035	0.0358698	0.0767501	A
BA	0.051155	0.01035	0.0307148	0.0715952	A
SB	0.04	0.01035	0.0195598	0.0604402	A
LR	0.0362	0.01035	0.0157598	0.0566402	A
(C): control group, (BA): Bifidobacterium animalis subsp. Lactis BB-12 group, (LR): Lactobacillus rhamnosus GG group, (SB): Saccharomyces boulardii CNCM I-745 group.
Sex effect
Contrast	Difference	Standardized difference	Critical value	Pr > Diff	Significant
Female vs Male	0.0197592	1.9091	1.9749	0.0580388	No
Tukey's d critical value:			2.79293
Category	LS means	Standard error	Lower bound (95%)	Upper bound (95%)	Groups
Female	0.0557958	0.00731854	0.0413424	0.0702492	A
Male	0.0360366	0.00731854	0.0215833	0.05049	A
Day effect
Contrast	Difference	Standardized difference	Critical value	Pr > Diff	Significant
0 vs 45	0.0538063	3.28794	2.75913	0.0107416	Yes
0 vs 60	0.0520563	3.181	2.75913	0.0149829	Yes
0 vs 30	0.0487042	2.97617	2.75913	0.0274962	Yes
0 vs 15	0.0433521	2.64911	2.75913	0.066459	No
15 vs 45	0.0104542	0.638824	2.75913	0.968469	No
15 vs 60	0.00870419	0.531887	2.75913	0.983939	No
15 vs 30	0.00535209	0.32705	2.75913	0.997506	No
30 vs 45	0.00510209	0.311773	2.75913	0.997931	No
30 vs 60	0.00335209	0.204836	2.75913	0.999604	No
60 vs 45	0.00175	0.106937	2.75913	0.99997	No
Tukey's d critical value:			3.90201
Category	LS means	Standard error	Lower bound (95%)	Upper bound (95%)	Groups
0	0.0855	0.0115716	0.0626472	0.108353	A
15	0.0421479	0.0115716	0.0192951	0.0650007	A	B
30	0.0367958	0.0115716	0.013943	0.0596486		B
60	0.0334437	0.0115716	0.0105909	0.0562965		B
45	0.0316937	0.0115716	0.0088409	0.0545465		B

## Sheet: Table S3I. BASO≠
Table S3I. Effects of dietary supplementation with probiotics on Basophile count of healthy rabbits.
Summary of the effects	Group (G)	ns	Sex (S)	ns	Day (D)	ns	G x S	***	G x D	ns	SxD	ns	GxSxD	ns
Significance::* P<0.05;**: P<0.01;***:P<0.001; ns: not significant
Details of all the effects
Group effect
Contrast	Difference	Standardized difference	Critical value	Pr > Diff	Significant
C vs SB	0.00140209	1.14611	2.59624	0.661567	No
C vs LR	0.00140209	1.14611	2.59624	0.661567	No
C vs BA	0.00140105	1.14525	2.59624	0.6621	No
BA vs SB	1.04712e-06	0.000855942	2.59624	1	No
BA vs LR	1.04712e-06	0.000855942	2.59624	1	No
LR vs SB	7.77915e-18	6.35887e-15	2.59624	1	No
Tukey's d critical value:			3.67163
Category	LS means	Standard error	Lower bound (95%)	Upper bound (95%)	Groups
C	0.00440209	0.000865043	0.00269372	0.00611047	A
BA	0.00300105	0.000865043	0.00129267	0.00470942	A
LR	0.003	0.000865043	0.00129163	0.00470837	A
SB	0.003	0.000865043	0.00129163	0.00470837	A
(C): control group, (BA): Bifidobacterium animalis subsp. Lactis BB-12, group, (LR): Lactobacillus rhamnosus GG group, (SB): Saccharomyces boulardii CNCM I-745 group.
Sex effect
Contrast	Difference	Standardized difference	Critical value	Pr > Diff	Significant
Male vs Female	0.00156649	1.81088	1.9749	0.0720347	No
Tukey's d critical value:			2.79293
Category	LS means	Standard error	Lower bound (95%)	Upper bound (95%)	Groups
Male	0.00413403	0.000611677	0.00292603	0.00534203	A
Female	0.00256754	0.000611677	0.00135954	0.00377554	A
Day effect
Contrast	Difference	Standardized difference	Critical value	Pr > Diff	Significant
0 vs 45	0.00374869	2.74077	2.75913	0.0524791	No
0 vs 15	0.00366623	2.68048	2.75913	0.0613607	No
0 vs 30	0.00358246	2.61923	2.75913	0.0716403	No
0 vs 60	0.00349869	2.55799	2.75913	0.0833053	No
60 vs 45	0.00025	0.182782	2.75913	0.999748	No
60 vs 15	0.000167539	0.122492	2.75913	0.999949	No
60 vs 30	8.37696e-05	0.0612462	2.75913	0.999997	No
30 vs 45	0.00016623	0.121535	2.75913	0.99995	No
30 vs 15	8.37696e-05	0.0612462	2.75913	0.999997	No
15 vs 45	8.24607e-05	0.0602892	2.75913	0.999997	No
Tukey's d critical value:			3.90201
Category	LS means	Standard error	Lower bound (95%)	Upper bound (95%)	Groups
0	0.00625	0.000967147	0.00433998	0.00816002	A
60	0.00275131	0.000967147	0.000841289	0.00466133	A
30	0.00266754	0.000967147	0.000757519	0.00457756	A
15	0.00258377	0.000967147	0.000673749	0.00449379	A
45	0.00250131	0.000967147	0.000591289	0.00441133	A
