# Supplementary material for: Influence of Three Probiotics Strains, Lactobacillus rhamnosus GG, Bifidobacterium animalis subsp. Lactis BB-12 and Saccharomyces boulardii CNCM I-745 on the Biochemical and Haematological Profiles and Body Weight of Healthy Rabbits
Source: Biology (Basel). 2021 Nov 17;10(11):1194. doi: 10.3390/biology10111194 (PMC8615081; doi:10.3390/biology10111194)
Supplement: Supplementary file 1 [file biology-10-01194-s001.zip › biology-1431328-supplementary_Table S4.xlsx]

## Sheet: Feuil1
Table S4: Growth performance of rabbits supplemented with three probiotics strains
Groups	Initial live weight (g/rabbit)	Final live weight (g/rabbit)	Weight gain (g/rabbit)	Daily feed intake (g/rabbit)	Daily weight gain	Daily Feed conversion ratio
C	599.8	2142.7b	1555.0b	95.50a	25.25c	3.77a
BA	606.9	2462.1a	1855.2a	89.40a	29.78b	2.91b
LR	600	2448.5a	1848.5a	89.60a	30.80ab	2.92b
SB	592.6	2616.5a	2023.9a	79.20b	33.72a	2.36c
P values	ns	***	***	***	***	***
(C): control group, (BA): Bifidobacterium animalis subsp. Lactis BB-12 group, (LR): Lactobacillus rhamnosus GG group, (SB): Saccharomyces boulardii CNCM I-745 group.
ns: no signficant, ***: P˂0.001
The variable in each column not followed with same letter are different (P < 0.05)
